# Supplementary material for: The relationship between CM and CO chondrites: Insights from combined analyses of titanium, chromium, and oxygen isotopes in CM, CO, and ungrouped chondrites
Source: PubMed Central journal article supplement — Geochim Cosmochim Acta. Author manuscript; Available in PMC 2021 Jul 26. (PMC8312627; doi:10.1016/j.gca.2021.03.004), 2021-03-10
Supplement: NIHMS1723576-supplement-Supplementary_text.pdf [file NIHMS1723576-supplement-Supplementary_text.pdf]

**Electronic Annex:**

**The relationship between CM and CO chondrites: Insights from combined analyses of titanium, chromium, and oxygen isotopes in CM, CO, and ungrouped chondrites**

Zachary A. Torrano<sup>a,1</sup>, Devin L. Schrader<sup>a,b</sup>, Jemma Davidson<sup>a,b</sup>, Richard C. Greenwood<sup>c</sup>, Daniel R. Dunlap<sup>a,2</sup>, and Meenakshi Wadhwa<sup>a</sup>

<sup>a</sup>School of Earth and Space Exploration, Arizona State University, Tempe, AZ, 85287, USA

<sup>b</sup>Center for Meteorite Studies, Arizona State University, Tempe, AZ, 85287, USA

<sup>c</sup>Planetary and Space Sciences, School of Physical Sciences, The Open University, Milton Keynes, MK7 6AA, United Kingdom

Corresponding Author: Zachary A. Torrano ([ztorrano@carnegiescience.edu](mailto:ztorrano@carnegiescience.edu))

<sup>1</sup>Present address: Earth and Planets Laboratory, Carnegie Institution for Science, Washington, DC, 20015

<sup>2</sup>Present address: Lunar and Planetary Institute, Houston, Texas 77058, USA

Supplementary Table EA1. The  $\epsilon^{46}\text{Ti}$ ,  $\epsilon^{48}\text{Ti}$ , and  $\epsilon^{50}\text{Ti}$  isotope compositions of the meteorite samples studied here, as well as of the BCR-2 terrestrial rock standard run during the same analytical sessions. The reported error is either the internal error (2SE) based on the number of analyses (n) of each sample solution or the external reproducibility (2SD), whichever is larger.

| Meteorite                   | Classification | $\epsilon^{46}\text{Ti}$ | $\epsilon^{48}\text{Ti}$ | $\epsilon^{50}\text{Ti}$ | n |
|-----------------------------|----------------|--------------------------|--------------------------|--------------------------|---|
| EET 83226                   | C2-ung         | 0.41 ± 0.17              | -0.01 ± 0.07             | 4.25 ± 0.15              | 6 |
| EET 83355                   | C2-ung         | 0.50 ± 0.17              | 0.00 ± 0.07              | 3.11 ± 0.15              | 3 |
| MAC 87300                   | C2-ung         | 0.53 ± 0.17              | -0.03 ± 0.08             | 4.67 ± 0.15              | 3 |
| NWA 5958                    | C2-ung         | 0.37 ± 0.09              | -0.01 ± 0.07             | 3.34 ± 0.15              | 5 |
| LEW 85332                   | C3-ung         | 0.33 ± 0.17              | -0.05 ± 0.07             | 2.42 ± 0.15              | 3 |
| MAC 88107                   | C3-ung         | 0.32 ± 0.17              | 0.04 ± 0.07              | 3.03 ± 0.15              | 6 |
| MAC 87301                   | C3-ung         | 0.59 ± 0.17              | 0.07 ± 0.07              | 4.12 ± 0.15              | 3 |
| Coolidge                    | C4-ung         | 0.33 ± 0.17              | -0.04 ± 0.07             | 2.67 ± 0.15              | 6 |
| LAP 04757                   | Chondrite-ung  | -0.13 ± 0.17             | 0.00 ± 0.07              | -0.19 ± 0.15             | 1 |
| LAP 04773                   | Chondrite-ung  | -0.28 ± 0.17             | -0.03 ± 0.07             | -0.54 ± 0.15             | 3 |
| GRO 95566                   | CM-an          | 0.47 ± 0.17              | -0.02 ± 0.07             | 3.50 ± 0.15              | 3 |
| Aguas Zarcas A <sup>1</sup> | CM2            | 0.30 ± 0.17              | -0.15 ± 0.07             | 2.21 ± 0.18              | 6 |
| Aguas Zarcas B <sup>1</sup> | CM2            | 0.25 ± 0.17              | -0.06 ± 0.07             | 2.86 ± 0.23              | 6 |
| Murchison                   | CM2            | 0.17 ± 0.17              | -0.07 ± 0.07             | 2.81 ± 0.15              | 5 |
| Murray                      | CM2            | 0.23 ± 0.17              | 0.00 ± 0.07              | 2.67 ± 0.15              | 6 |
| Isna                        | CO3.8          | 0.33 ± 0.17              | 0.00 ± 0.08              | 2.83 ± 0.15              | 6 |
| BCR-2                       | Ter. Std.      | -0.13 ± 0.17             | 0.02 ± 0.07              | -0.04 ± 0.15             | 5 |
| BCR-2                       | Ter. Std.      | -0.09 ± 0.17             | 0.03 ± 0.07              | -0.03 ± 0.17             | 6 |

<sup>1</sup>Aguas Zarcas A is from the less altered lithology and Aguas Zarcas B is from the more altered lithology.

Supplementary Table EA2. The  $\epsilon^{53}\text{Cr}$  and  $\epsilon^{54}\text{Cr}$  isotope compositions of the meteorite samples studied here, as well as of the DTS-1 terrestrial rock standard and the Smithsonian Allende CV chondrite reference powder run during the same analytical sessions. The reported error is either the internal error (2SE) based on the number of analyses (n) of each sample solution or the external reproducibility (2SD), whichever is larger.

| Meteorite                   | Classification | $\epsilon^{53}\text{Cr}$ | $\epsilon^{54}\text{Cr}$ | n  |
|-----------------------------|----------------|--------------------------|--------------------------|----|
| EET 83226                   | C2-ung         | 0.13 ± 0.07              | 0.93 ± 0.13              | 6  |
| EET 83355                   | C2-ung         | 0.11 ± 0.07              | 0.76 ± 0.13              | 6  |
| MAC 87300                   | C2-ung         | 0.04 ± 0.11              | 0.71 ± 0.14              | 6  |
| NWA 5958                    | C2-ung         | 0.26 ± 0.07              | 1.18 ± 0.16              | 6  |
| LEW 85332                   | C3-ung         | 0.18 ± 0.07              | 1.23 ± 0.13              | 6  |
| MAC 88107                   | C3-ung         | 0.20 ± 0.07              | 1.11 ± 0.15              | 6  |
| MAC 87301                   | C3-ung         | 0.09 ± 0.07              | 0.83 ± 0.14              | 6  |
| Coolidge                    | C4-ung         | 0.01 ± 0.07              | 0.59 ± 0.13              | 6  |
| LAP 04757                   | Chondrite-ung  | 0.17 ± 0.09              | -0.33 ± 0.13             | 6  |
| LAP 04773                   | Chondrite-ung  | 0.08 ± 0.09              | -0.46 ± 0.16             | 6  |
| GRO 95566                   | CM-an          | 0.13 ± 0.08              | 0.92 ± 0.13              | 3  |
| Aguas Zarcas A <sup>1</sup> | CM2            | 0.22 ± 0.07              | 0.98 ± 0.13              | 6  |
| Aguas Zarcas B <sup>1</sup> | CM2            | 0.20 ± 0.09              | 0.88 ± 0.13              | 6  |
| Murchison                   | CM2            | 0.21 ± 0.07              | 1.10 ± 0.15              | 6  |
| Murray                      | CM2            | 0.13 ± 0.07              | 0.84 ± 0.13              | 6  |
| Isna                        | CO3.8          | 0.11 ± 0.08              | 0.66 ± 0.14              | 6  |
| Allende                     | CV3            | 0.08 ± 0.07              | 0.87 ± 0.13              | 6  |
| Allende                     | CV3            | 0.11 ± 0.07              | 0.94 ± 0.13              | 11 |
| DTS-1                       | Ter. Std.      | 0.08 ± 0.07              | 0.06 ± 0.13              | 6  |

<sup>1</sup>Aguas Zarcas A is from the less altered lithology and Aguas Zarcas B is from the more altered lithology.

### EA.1. Additional Cr Purification to Prevent Isobaric Interference Effects

In Fig. S1, we have shown the theoretical effect of isotopically mass-fractionated residual Fe (for  $\delta^{56}\text{Fe} = -1, -2, -5, \text{ and } -10 \text{ ‰}$ ) on measured  $\epsilon^{54}\text{Cr}$  values following a typical Fe interference correction assuming unfractionated  $^{56}\text{Fe}/^{54}\text{Fe}$  (i.e.  $\delta^{56}\text{Fe} = 0 \text{ ‰}$ ) and an identical isotopic instrumental mass bias for Cr and Fe. Because the  $\delta^{56}\text{Fe}$  of any residual Fe remaining in the sample after column chemistry is not directly measured, these theoretical calculations are for illustrative purposes only. It is therefore necessary to measure the Fe/Cr and  $\epsilon^{54}\text{Cr}$  of rock standards of known isotopic composition to confirm the accuracy and precision of our methodology utilized here (including the chemical separation procedures and mass spectrometric methods) for Cr isotopic analyses.

In order to verify that there was no effect on  $\epsilon^{54}\text{Cr}$  because of isotopically mass-fractionated residual Fe, we measured the bulk unprocessed Fe/Cr ratios, post-chemistry Fe/Cr ratios, and  $\epsilon^{54}\text{Cr}$  of the terrestrial rock standard DTS-1 and the Allende CV3 chondrite reference powder alongside the sample measurements. The bulk unprocessed Fe/Cr ratio was  $\sim 70$  for the Allende reference powder and  $\sim 15$  for DTS-1; the Fe/Cr was  $\sim 55\text{-}75$  for the meteorite samples studied here. Using the theoretical calculations illustrated in Fig. 4 as a guide, we measured the Cr isotopic composition of the rock standards only when  $^{56}\text{Fe}/^{52}\text{Cr} < 5 \times 10^{-4}$  (measured via MC-ICPMS) was attained in the post-chemistry purified Cr solution. The average  $\epsilon^{54}\text{Cr}$  value of DTS-1 measured in this study was  $0.06 \pm 0.13$  (2SD), which is within error of zero. The  $\epsilon^{54}\text{Cr}$  value for two separately processed aliquots of the Allende reference powder measured in this study were  $0.87 \pm 0.13$  (2SD) and  $0.94 \pm 0.13$  (2SD), which are in agreement with the average value of  $0.89 \pm 0.11$  (2SD) from previous measurements in other laboratories (Shukolyukov and Lugmair, 2006; Trinquier et al., 2007; Qin et al., 2010; Williams et al., 2020). These data demonstrate that accurate  $\epsilon^{54}\text{Cr}$  values are obtained for standards with bulk Fe/Cr ratios similar to those of the meteorite samples studied here and confirm that there is no effect on the measured  $\epsilon^{54}\text{Cr}$  outside of the analytical uncertainty as a result of residual Fe when post-chemistry  $^{56}\text{Fe}/^{52}\text{Cr} < 5 \times 10^{-4}$  was achieved in these samples.

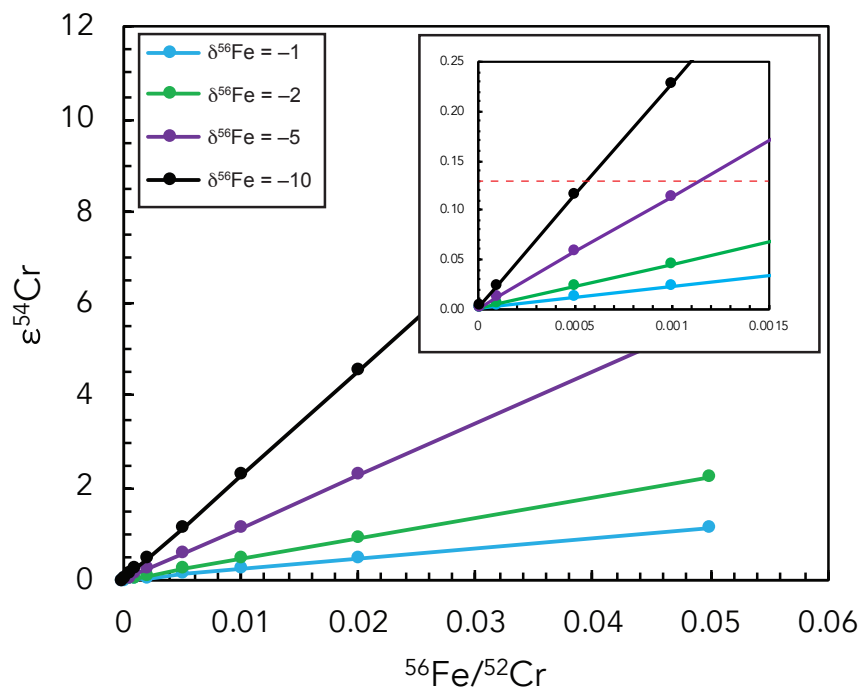

Supplementary Fig. EA1. Theoretical calculations of  $\epsilon^{54}\text{Cr}$  versus  $^{56}\text{Fe}/^{52}\text{Cr}$  show the potential effects of residual Fe on isotopic measurements of Cr via MC-ICPMS for varying degrees of isotopic fractionation of the residual Fe due to column chemistry procedures. Inset shows a magnification of the lower-left corner of the plot with red dashed line indicating the external reproducibility (2SD) of the  $\epsilon^{54}\text{Cr}$  measurements.

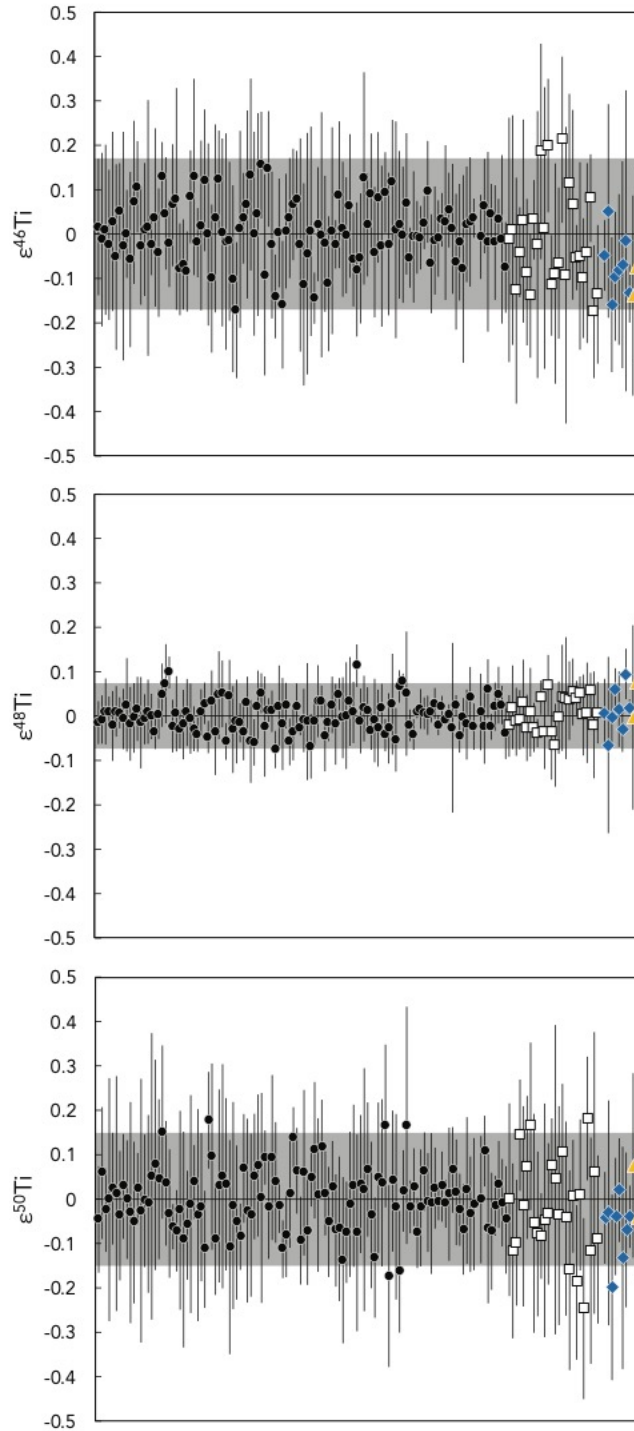

Supplementary Fig. EA2. The external reproducibility (2SD) for  $\epsilon^{46}\text{Ti}$  ( $\pm 0.17$ ),  $\epsilon^{48}\text{Ti}$  ( $\pm 0.07$ ), and  $\epsilon^{50}\text{Ti}$  ( $\pm 0.15$ ), shown as gray bands, based on repeat analyses of NIST 3162a (black circles) and SPEX (white squares) Ti standard solutions and the geological reference materials BCR-2 (blue diamonds) and AGV-1 (orange triangles) analyzed in this study and by Torrano et al. (2019). All measurements shown here were acquired at the same intensities.

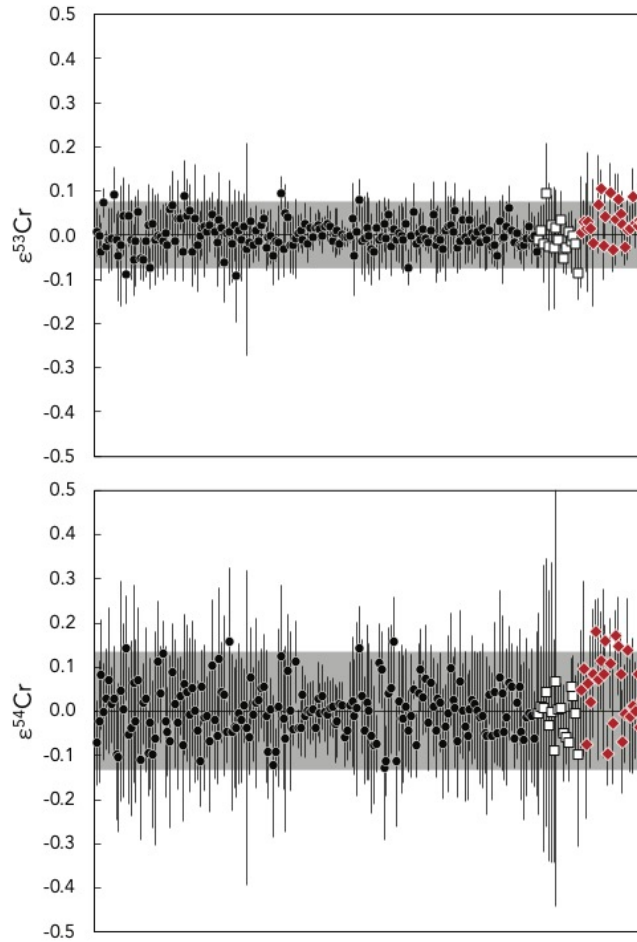

Supplementary Fig. EA3. The external reproducibility (2SD) for  $\epsilon^{53}\text{Cr}$  ( $\pm 0.07$ ) and  $\epsilon^{54}\text{Cr}$  ( $\pm 0.13$ ), shown as gray bands, based on repeat runs of NIST SRM 979 (black circles) and SPEX (white squares) Cr standard solutions and geological reference material DTS-1 (red diamonds). All measurements shown here were acquired at the same intensities.
